# Supplementary material for: Hollow metal–organic nanoparticles as redox species for label-free voltammetric immunoassay of prostate specific antigen
Source: Royal Society of Chemistry journal article supplement (doi:10.1039/c6nj03463b), 2016-12-17
Supplement: c6nj03463b1.pdf [file c6nj03463b1.pdf]

## Hollow metal-organic nanoparticles as redox species for label-free voltammetric immunoassay of prostate specific antigen

Weixiang Li, Qinfeng Rong, and Zhanfang Ma\*

Department of Chemistry, Capital Normal University, Beijing, 100048, China.

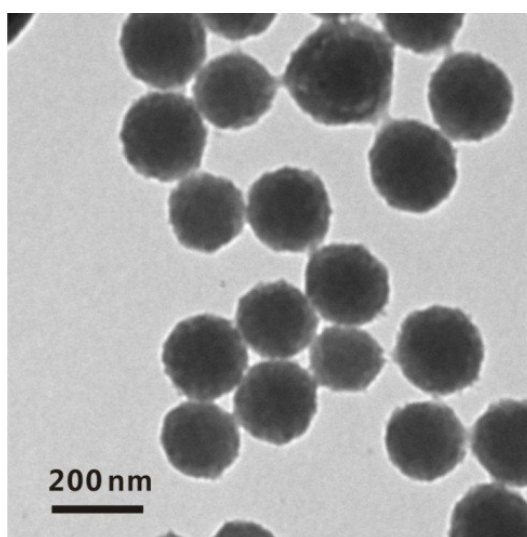

**Figure S1.** TEM image of the solid cadmium organic nanoparticles.

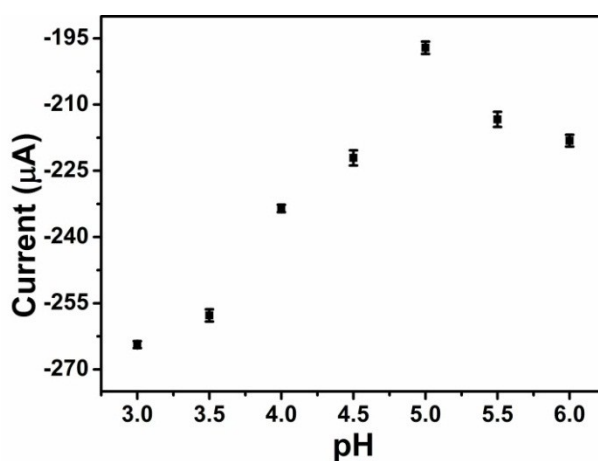

**Figure S2.** The effect of pH on square wave voltammetry (SWV) current responses of this biosensor towards  $10 \text{ ng mL}^{-1}$  PSA.

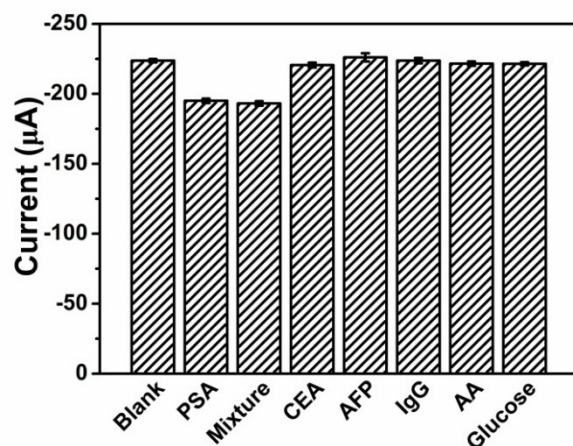

**Figure S3.** Current response of the biosensor to 10 ng mL<sup>-1</sup> PSA, mixture (10 ng/mL PSA + 100 ng mL<sup>-1</sup> alpha fetoprotein (AFP) + 100 ng mL<sup>-1</sup> carcino-embryonic antigen (CEA) + 100 ng mL<sup>-1</sup> Human immunoglobulin G (IgG) + 100 ng mL<sup>-1</sup> ascorbic acid (AA) + 100 ng mL<sup>-1</sup> Glucose), 100 ng mL<sup>-1</sup> CEA, 100 ng mL<sup>-1</sup> AFP, 100 ng mL<sup>-1</sup> IgG, 100 ng mL<sup>-1</sup> AA, and 100 ng mL<sup>-1</sup> glucose.

**Table S1.** Determination of PSA in human serum samples (n= 3).

| Sample | This work<br>(ng mL <sup>-1</sup> ) | ELISA<br>(ng<br>mL <sup>-1</sup> ) | Relative<br>error (%) |
|--------|-------------------------------------|------------------------------------|-----------------------|
| 1      | 1.24±0.025                          | 1.30                               | -4.3                  |
| 2      | 1.57±0.041                          | 1.53                               | 2.9                   |
| 3      | 1.01±0.032                          | 1.05                               | -3.7                  |
| 4      | 2.30±0.016                          | 2.13                               | 7.2                   |
| 5      | 1.30±0.053                          | 1.22                               | 6.2                   |
| 6      | 0.97±0.017                          | 0.95                               | -1.6                  |
| 7      | 0.83±0.041                          | 0.85                               | 2.3                   |
| 8      | 1.06±0.034                          | 1.07                               | 0.7                   |
| 9      | 0.75±0.058                          | 0.78                               | 3.9                   |
| 10     | 1.13±0.022                          | 1.08                               | 4.1                   |

**Table S2.** A comparison of the performance of the present and referenced immunosensors for the detection of PSA.

| Substrate materials     | Method                    | Linear range (ng/mL) | Detection limit (pg/mL) | Sensitivity ( $\mu\text{A}/(\text{lgC})$ ) (C: $\text{ng ml}^{-1}$ ) | Ref.      |
|-------------------------|---------------------------|----------------------|-------------------------|----------------------------------------------------------------------|-----------|
| Au-NH <sub>2</sub> /rGO | Cyclic voltammetry        | 0.0005-15            | 0.17                    | 11.83                                                                | 1         |
| 3,4-Diaminobenzoic acid | Linear-sweep voltammogram | 0.2-16               | 100                     | 5.42                                                                 | 2         |
| Graphene/gold           | Cyclic voltammetry        | 0-10                 | 0.59                    | 4.8                                                                  | 3         |
| Gold nanorods           | Chronocoulometry          | 0.004-60             | 1.5                     | 11.67                                                                | 4         |
| Nafion-Graphene/CdOPs   | Square wave voltammetry   | 0.01-100             | 0.97                    | 9.37                                                                 | This work |

### References:

- 1 L. Tian, L. Liu, Y. Li, Q. Wei and W. Cao, *New J. Chem.*, 2015, **39**, 5522-5528.
- 2 S. Zhang, P. Du and F. Li, *Talanta*, 2007, **72**, 1487-1493.
- 3 H. D. Jang, S. K. Kim, H. Chang and J.-W. Choi, *Biosens. Bioelectron.*, 2015, **63**, 546.
- 4 G. Sun, H. Liu, Y. Zhang, J. Yu, M. Yan, X. Song and W. He, *New J. Chem.*, 2015, **39**, 6062-6067.
